# Supplementary material for: Effect of interfacial rheology on drop coalescence in water–oil emulsion
Source: Royal Society of Chemistry journal article supplement (doi:10.1039/d1sm01382c), 2022-01-01
Supplement: d1sm01382c1.pdf [file d1sm01382c1.pdf]

## ELECTRONIC SUPPORTING INFORMATION

# Effect of Interfacial Rheology on Drop Coalescence in Water-Oil Emulsion

Talita Coffler Botti<sup>a,1</sup>, Anthony Hutin<sup>a</sup>, Erick Quintella<sup>b</sup>, Marcio S. Carvalho<sup>a,2</sup>

<sup>a</sup> Dept. of Mechanical Engineering, Pontifícia Universidade Católica do Rio de Janeiro, Rio de Janeiro, Brazil

<sup>b</sup> Petrobras, Rio de Janeiro, Brazil

emails : <sup>1</sup>talita@lmp.mec.puc-rio.br; <sup>2</sup>msc@lmp.mec.puc-rio.br

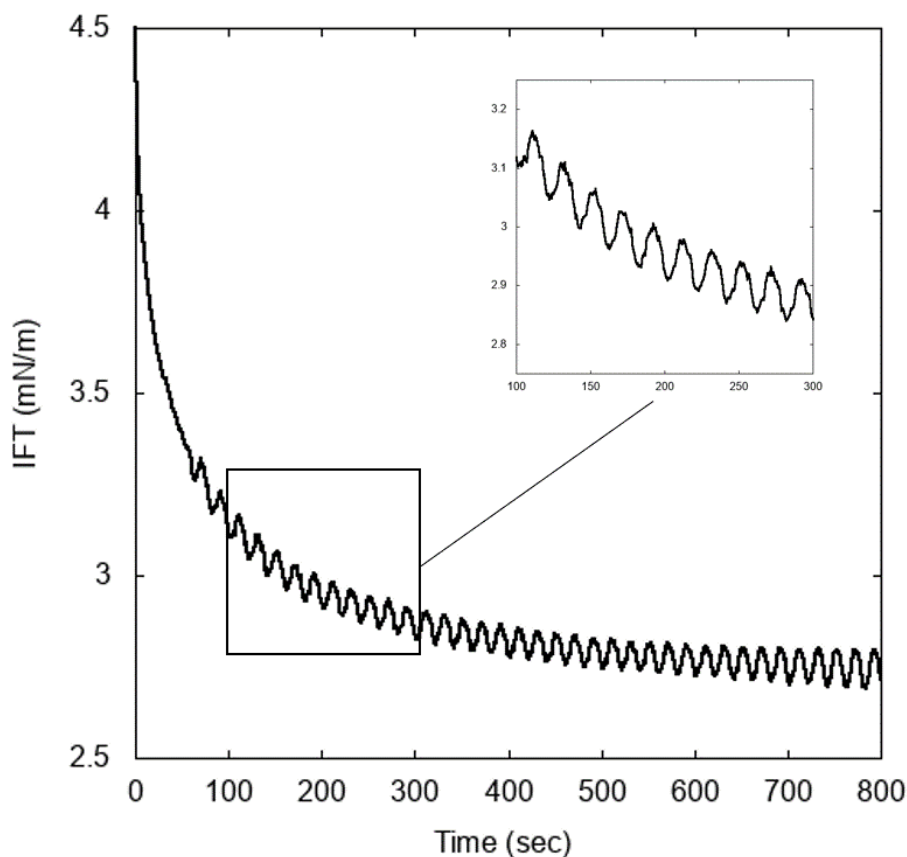

**Figure S1:** Dynamic interfacial tension for 1.5 %wt. of Span 80, during the oscillation of the drop volume at frequency of 0.05 Hz. (IFT: interfacial tension)

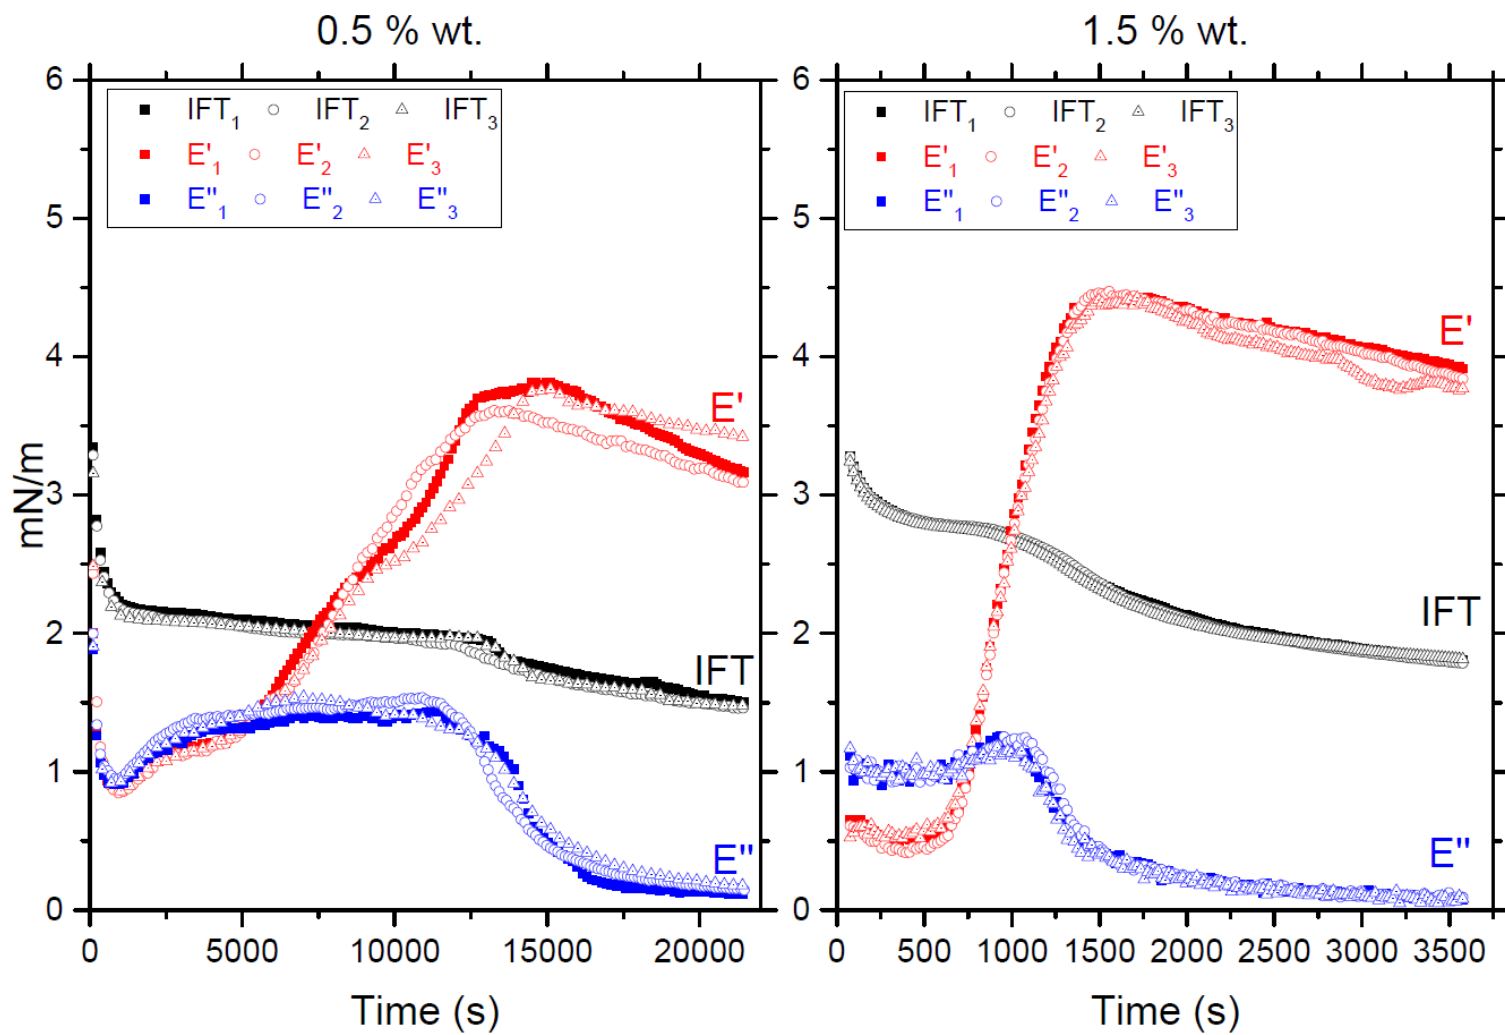

**Figure S2:** Example of repeatability of interfacial rheological tests conducted at 0.05 Hz and 10% amplitude for 0.5 and 1.5 %wt. Span 80. (E': elastic modulus, E'': viscous modulus)

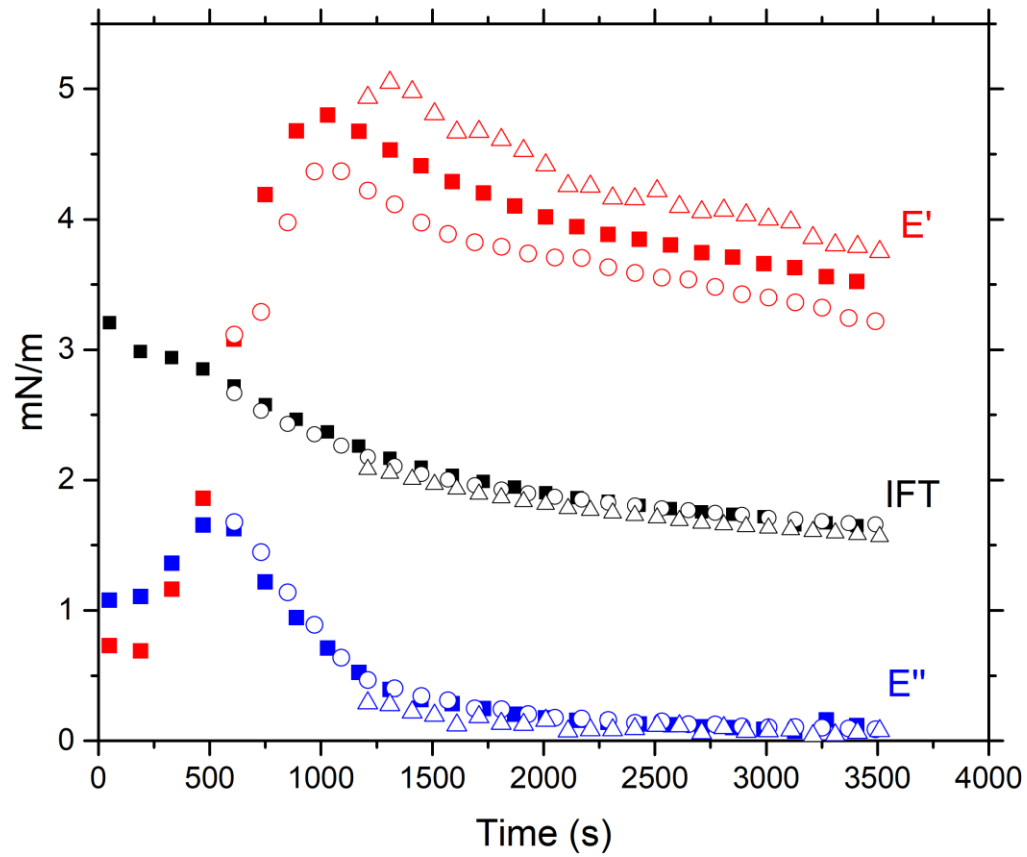

**Figure S3:** Influence of aging time on the interfacial properties of 2 %wt. Span 80. Oscillations of the interface are started after 0 min (squares), 10 min (circles), and 20 min (triangles) of aging.
